# Supplementary material for: Motor function and incident dementia: a systematic review and meta-analysis
Source: Oxford University Press journal article supplement (doi:10.1093/ageing/afx084), 2017-05-06
Supplement: afx084_aa-16-0834-File002.docx [file afx084_aa-16-0834-File002.docx]

SUPPLEMENTARY MATERIAL

**Appendix 2: Quality Assessment and Risk of Bias**

| **COHORT STUDIES** | **Selection**  **(max 4 *)** | **Comparability (max 2 *)** | **Outcome (max 3 *)** | **Total (/9)** |
| --- | --- | --- | --- | --- |
| **Aggarwal et al. (2006)** | *** | ** | *** | 8 |
| **Albala et al (2014)** | *** | ** | * | 6 |
| **Amieva et al (2003)** | *** |  | ** | 5 |
| **Anang et al. (2014)** | **** | ** | *** | 9 |
| **Bermejo-Pareja et al. (2007)** | **** | ** | ** | 8 |
| **Buchman et al. (2007)** | *** | ** | *** | 8 |
| **Buchman et al. (2011)** | **** | ** | *** | 9 |
| **Bugalho et al. (2013)** | **** |  | ** | 6 |
| **Camargo et al. (2016)** | **** | ** | *** | 9 |
| **Camicioli et al. (2007)** | *** | ** | ** | 7 |
| **Domellöf et al. (2015)** | **** | ** | ** | 8 |
| **Duara et al. (2011)** | **** | ** | * | 7 |
| **Dumurgier et al. (2016)** | **** | ** | *** | 9 |
| **Gago et al. (2009)** | *** |  | *** | 6 |
| **Gray et al. (2013)** | **** | ** | ** | 8 |
| **Hobson et al. (2004)** | **** |  | ** | 6 |
| **Israeli-Korn et al. (2010)** | *** |  | *** | 6 |
| **Lee et al. (2015)** | **** | * | ** | 7 |
| **Lee et al. (2016)** | ** | ** | ** | 6 |
| **Levy et al. (2000)** | **** | ** | *** | 9 |
| **Louis et al. (2004)** | **** | ** | *** | 9 |
| **Louis et al. (2010)** | **** | ** | ** | 8 |
| **Montero-Odasso et al. (2016)** | **** | ** | * | 7 |
| **Shill et al. (2014)** | **** | ** | ** | 8 |
| **Taaffe et al. (2008)** | *** | * | ** | 6 |
| **Thawani et al. (2009)** | **** | ** | *** | 9 |
| **Verghese et al. (2002)** | **** | ** | *** | 9 |
| **Verghese et al. (2007)** | **** | ** | *** | 9 |
| **Verghese et al. (2007)** | **** | ** | * | 7 |
| **Verghese et al. (2013)** | **** | ** | ** | 8 |
| **Verghese et al. (2014)** | **** | ** | ** | 8 |
| **Waite et al. (2005)** | *** |  | *** | 6 |
| **Wang et al. (2006)** | **** | ** | *** | 9 |
| **Welmer et al. (2014)** | **** | ** | *** | 9 |
| **Wilson et al. (2003)** | *** | ** | *** | 8 |
| **Zhu et al. (2014)** | **** |  | ** | 6 |
| **CASE-CONTROL STUDY** | **Selection (max 4*)** | **Comparability (max 2*)** | **Exposure (max 3*)** | **Total (/9)** |
| **Ramakers et al. (2007)** | *** | ** | ***** | 6 |

**Table 2S.** Newcastle-Ottawa Quality assessment scale ratings for all included studies.

**Figure 1S.** Funnel plot to assess publication bias for meta analysis of overall parkinsonism measured as a dichotomous exposure.

**Figure 2S.** Funnel plot to assess publication bias for meta analysis of tremor measured as a dichotomous exposure.

**Figure 3S**. Funnel plot to assess publication bias for gait velocity measured as a dichotomous exposure.
