# Supplementary material for: Motor function and incident dementia: a systematic review and meta-analysis
Source: Oxford University Press journal article supplement (doi:10.1093/ageing/afx084), 2017-05-06
Supplement: afx084_aa-16-0834-File004.docx [file afx084_aa-16-0834-File004.docx]

SUPPLEMENTARY MATERIAL

**Appendix 4: Complete Reference List**

1. Montero-Odasso M, Verghese J, Beauchet O, Hausdorff JM. Gait and Cognition: A complementary approach to understanding brain function and the risk of falling. *J Am Geriatr Soc*. 2012;60:2127-2136. doi:10.1111/j.1532-5415.2012.04209.x.
2. Deary IJ, Corley J, Gow AJ, et al. Age-associated cognitive decline. *Br Med Bull.* 2009;92(1):135-152. doi:10.1093/bmb/ldp033.
3. Beauchet O, Allali G, Berrut G, Hommet C, Dubost VV, Assal FF. Gait analysis in demented subjects: Interests and perspectives. *Neuropsychiatr Dis Treat.* 2008;4(1):155-160. doi:10.2147/NDT.S2070.
4. Montero-Odasso M, Oteng-Amoako A, Speechley M, et al. The motor signature of mild cognitive impairment: Results from the Gait and Brain Study. *Journals Gerontol Ser A Biol Sci Med Sci.* 2014;69(11):1415-1421. doi:10.1093/gerona/glu155.
5. Montero-Odasso M, Hachinski V. Preludes to brain failure: Executive dysfunction and gait disturbances. *Neurol Sci.* 2014;35(4):601-604. doi:10.1007/s10072-013-1613-4.
6. Buracchio T, Dodge HH, Howieson D, Wasserman D, Kaye J. The trajectory of gait speed preceding mild cognitive impairment. *Arch Neurol.* 2010;67(8):980-986. doi:10.1001/archneurol.2010.159.
7. Li J-Q, Tan L, Wang H-F, et al. Risk factors for predicting progression from mild cognitive impairment to Alzheimer’s disease: A systematic review and meta-analysis of cohort studies. *J Neurol Neurosurg Psychiatry.* 2015;0:1-9. doi:10.1136/jnnp-2014-310095.
8. Cooper C, Sommerlad A, Lyketsos CG, Livingston G. Modifiable predictors of dementia in mild cognitive impairment: A systematic review and meta-analysis. *Am J Psychiatry.* 2015;172(4):323-334. doi:10.1176/appi.ajp.2014.14070878.
9. Beauchet O, Annweiler C, Callisaya ML, et al. Poor gait performance and prediction of dementia: Results from a meta-analysis. *J Am Med Dir Assoc.* 2016. doi:10.1016/j.jamda.2015.12.092.
10. McHugh ML. Interrater reliability: The kappa statistic. *Biochemia Medica* 2012;22(3):276-282.
11. Wells GA, Shea B, O’Connell D, Peterson J, Welch V, Losos M, Tugwell P. The Newcastle-Ottawa Scale (NOS) for assessing the quality of nonrandomised studies in meta-analysis. http://www.ohri.ca/programs/clinical_epidemiology/oxford.asp. Published 2014. Accessed December 5, 2015.
12. Borenstein M, Hedges L, Higgins J, Rothstein H. Comprehensive Meta-Analysis. 2014. https://www.meta-analysis.com/index.php.
13. Verghese J, Derby C, Katz MJ, Lipton RB. High risk neurological gait syndrome and vascular dementia. *J Neural Transm.* 2007;114(10):1249-1252. doi:10.1007/s00702-007-0762-0.
14. Thawani S, Schupf N, Louis E. Essential tremor is associated with dementia: Prospective population-based study in New York. *Neurology.* 2009;73(8):621-625 5p. doi:10.1212/WNL.0b013e3181b389f1.
15. Louis ED, Tang MX, Mayeux R. Parkinsonian signs in older people in a community-based study: Risk of incident dementia. *Arch Neurol.* 2004;61:1273-1276. doi:10.1001/archneur.61.8.1273.
16. Dumurgier J, Artaud F, Touraine C, et al. Gait speed and decline in gait speed as predictors of incident dementia. Journals Gerontol - Med Sci. 2016;0(0):1-7.
17. Camargo EC, Weinstein G, Beiser A, et al. Association of physical function with clinical and subclinical brain disease: The Framingham Offspring Study. *J Alzheimer’s Dis.* 2016;53:1597-1608.
18. Buchman AS, Leurgans SE, Boyle P, Schneider J, Arnold SE, Bennett D. Combinations of motor measures more strongly predict adverse health outcomes in old age: The rush memory and aging project, a community-based cohort study. *BMC Med.* 2011;9(1):42. doi:10.1186/1741-7015-9-42.
19. Anang J, Gagnon JF, Bertrand JA, et al. Predictors of dementia in Parkinson disease: A prospective cohort study. *Neurology.* 2014;83:1253-1260. doi:10.1212/WNL.0000000000001408.
20. Levy G, Tang M-X, Cote LJ, et al. Motor impairment in PD: Relationship to incident dementia and age. *Neurology.* 2000;55(4):539-544.
21. Verghese J, Lipton RB, Hall CB, Kuslansky G, Katz MJ, Buschke H. Abnormality of gait as a predictor of non-Alzheimer’s Dementia. *N Engl J Med.* 2002;347(22):1761-1768.
22. Welmer A-K, Rizzuto D, Qiu C, Caracciolo B, Laukka EJ. Walking speed, processing speed, and dementia: A population-based longitudinal study. *J Gerontol A Biol Sci Med Sci.* 2014;69(12):1503-1510. doi:10.1093/gerona/glu047.
23. Wang L, Larson EB, Bowen JD, van Belle G. Performance-based physical function and future dementia in older people. *Arch Intern Med.* 2006;166(10):1115-1120. doi:10.1001/archinte.166.10.1115.
24. Aggarwal NT, Wilson RS, Beck TL, Bienias JL, Bennett DA. Motor dysfunction in mild cognitive impairment and the risk of incident Alzheimer disease. *Arch Neurol.* 2006;63(12):1763-1769. doi:10.1001/archneur.63.12.1763.
25. Albala B, Lera M, Sanchez R et al. Physical performance predicts 2y incidence of dementia. *Eur Geriatr Med.* 2014;5:S103. doi:10.1016/S1878-7649(14)70243-8.
26. Amieva H, Letenneur L, Dartigues JF, et al. Annual rate and predictors of conversion to dementia in subjects presenting mild cognitive impairment criteria defined according to a population-based study. *Dement Geriatr Cogn Disord.* 2004;18(1):87-93. doi:10.1159/000077815.
27. Verghese J, Annweiler C, Ayers E, et al. Motoric cognitive risk syndrome multicountry prevalence and dementia risk. *Neurology.* 2014;83(8):718-726. doi:10.1212/WNL.0000000000000717
28. Buchman AS, Wilson RS, Boyle PA, Bienias JL, Bennett DA. Grip strength and the risk of incident Alzheimer’s disease. *Neuroepidemiology*. 2007;29(1-2):66-73. doi:10.1159/000109498.
29. Israeli-Korn SD, Massarwa M, Schechtman E, et al. Mild cognitive impairment is associated with mild parkinsonian signs in a door to door study of an elderly Arab population. *J Alzheimers Dis.* 2010;22(3):1005-1013. doi:10.1016/j.micinf.2011.07.011.
30. Lee S-J, Lee D-G. The cross-sectional and longitudinal relationships between white matter hyperintensities and dementia in patients with Parkinson’s disease: A retrospective analysis of 132 patients in a single center. *Arch Gerontol Geriatr.* 2016;62:133-137.
31. Taaffe DR, Irie F, Masaki KH, et al. Physical activity, physical function, and incident dementia in elderly men: The Honolulu-Asia Aging Study. *J Gerontol A Biol Sci Med Sci.* 2008;63(5):529-535.
32. Waite LM, Grayson D a., Piguet O, Creasey H, Bennett HP, Broe G. Gait slowing as a predictor of incident dementia: 6-Year longitudinal data from the Sydney Older Persons Study. *J Neurol Sci.* 2005;229-230:89-93. doi:10.1016/j.jns.2004.11.009.
33. Wilson RS, Schneider JA, Bienias JL, Evans DA, Bennett DA. Parkinsonianlike signs and risk of incident Alzheimer disease in older persons. *Arch Neurol.* 2003;60(4):539-544. doi:10.1001/archneur.60.4.539\r60/4/539 [pii].
34. Bugalho P, Viana-Baptista M. Predictors of cognitive decline in the early stages of Parkinson’s Disease: A brief cognitive assessment longitudinal study. *J Neurol Sci.* 2013;333:e137-e138.
35. Gago MF, Garrett MC, Fonseca MR, et al. How do cognitive and axial motor signs correlate in Parkinson’s disease? A 6-year prospective study. *J Neurol.* 2009;256(10):1655-1662. doi:10.1007/s00415-009-5174-7.
36. Hobson P, Meara J. Risk and incidence of dementia in a cohort of older subjects with Parkinson’s disease in the United Kingdom. *Mov Disord.* 2004;19(9):1043-1049. doi:10.1002/mds.20216.
37. Zhu K, van Hilten JJ, Marinus J. Predictors of dementia in Parkinson’s disease; findings from a 5-year prospective study using the SCOPA-COG. *Park Relat Disord.* 2014;20(9):980-985. doi:10.1016/j.parkreldis.2014.06.006.
38. Lee A, Richards M, Chan WC, Chiu HFK, Lee RSY, Lam LC. Poor balance as a noncognitive predictor of incident dementia. *J Am Geriatr Soc.* 2015;63(8):1701-1702.
39. Bermejo-Pareja F, Louis ED, Benito-León J. Risk of incident dementia in essential tremor: A population-based study. *Mov Disord.* 2007;22(11):1573-1580. doi:10.1002/mds.21553.
40. Camicioli R, Wang Y, Powell C, Mitnitski A, Rockwood K. Gait and posture impairment, parkinsonism and cognitive decline in older people. *J Neural Transm.* 2007;114(10):1355-1361. doi:10.1007/s00702-007-0778-5.
41. Domellöf ME, Ekman U, Forsgren L, Elgh E. Cognitive function in the early phase of Parkinson’s disease, a five-year follow-up. *Acta Neurol Scand.* 2015;132(2):79-88. doi:10.1111/ane.12375.
42. Duara R, Loewenstein DA, Greig MT, et al. Pre-MCI and MCI: Neuropsychological, clinical, and imaging features and progression rates. *Am J Geriatr Psychiatry.* 2011;19(11):951-960.
43. Gray SL, Anderson ML, Hubbard RA, et al. Frailty and incident dementia. *Journals Gerontol Ser A Biol Sci Med Sci.* 2013;68(9):1083-1090. doi:10.1093/gerona/glt013.
44. Louis ED, Tang MX, Schupf N. Mild parkinsonian signs are associated with increased risk of dementia in a prospective, population-based study of elders. *Mov Disord.* 2010;25(2):172-178. doi:10.1002/mds.22943.
45. Montero-Odasso MM, Barnes B, Speechley M, et al. Disentangling cognitive-frailty: Results from the Gait and Brain Study. *J Gerontol A Biol Sci Med Sci.* 2016;0(0):1-7. doi:10.1093/gerona/glw044.
46. Shill HA, Hentz JG, Jacobson SA, et al. Essential tremor in the elderly and risk for dementia. 2014;2014:1-5. doi:10.1155/2014/328765.
47. Verghese J, Wang C, Lipton RB, Holtzer R, Xue X. Quantitative gait dysfunction and risk of cognitive decline and dementia. *J Neurol Neurosurg Psychiatry.* 2007;78(9):929-935. doi:10.1136/jnnp.2006.106914.
48. Verghese J, Wang C, Lipton RB, Holtzer R. Motoric Cognitive Risk Syndrome and the Risk of Dementia. *Journals Gerontol Ser A Biol Sci Med Sci.* 2013;68(4):412-418. doi:10.1093/gerona/gls191.
49. Ramakers IHGB, Visser PJ, Aalten P, et al. Symptoms of preclinical dementia in general practice up to five years before dementia diagnosis. *Dement Geriatr Cogn Disord.* 2007;24(4):300-306. doi:10.1159/000107594.
50. Desrosiers J, Hébert R, Bravo G, Dutil E. The Purdue Pegboard Test: normative data for people aged 60 and over. *Disabil Rehabil*. 1995;17(5):217-224. doi:10.3109/09638289509166638.
51. Montero-Odasso M. Gait as a biomarker of cognitive impairment and dementia syndromes. Quo vadis? *Eur J Neurol.* 2015:437-438. doi:10.1111/ene.12908.
52. Montero-Odasso M, Annweiler C, Hachinski V, Islam A, Toma N, Vasudev A. Vascular burden predicts gait, mood, and executive function disturbances in older adults with mild cognitive impairment: results from the gait and brain study. J Am Geriatr Soc 2012;60:1988-1990.
